# Supplementary material for: A mechanical lumped-element model of the human middle ear for bone conduction hearing
Source: Research Square preprint supplement (doi:10.21203/rs.3.rs-6262568/v1), 2025-04-25
Supplement: Supplementary file 1 [file 8d336957003a37b12b923782.docx]

**Supplementary Information**


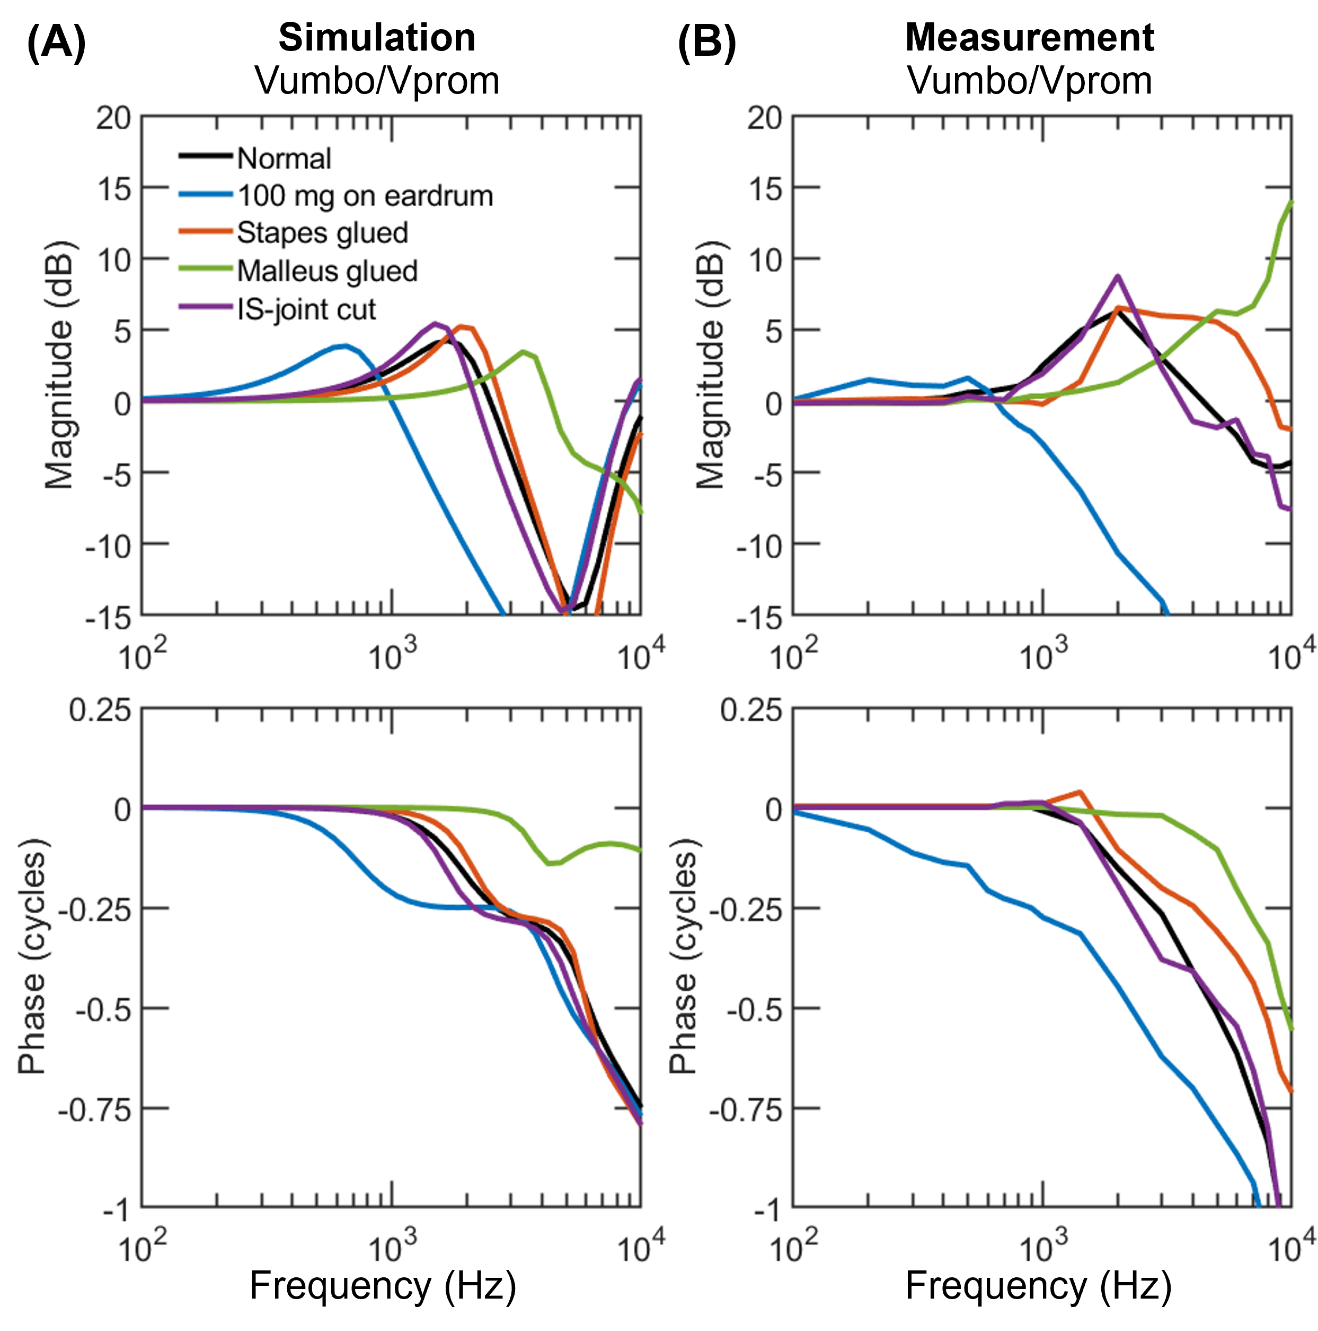


**Supplemental Figure 1.** Simulated (A) and measured (B) ratio of the umbo velocity to the promontory velocity in human ears under normal (black lines) and perturbed ear conditions (color lines). The simulations are performed using the fitted parameters. The measurements are from Stenfelt et al. (25). IS joint: incudostapedial joint.


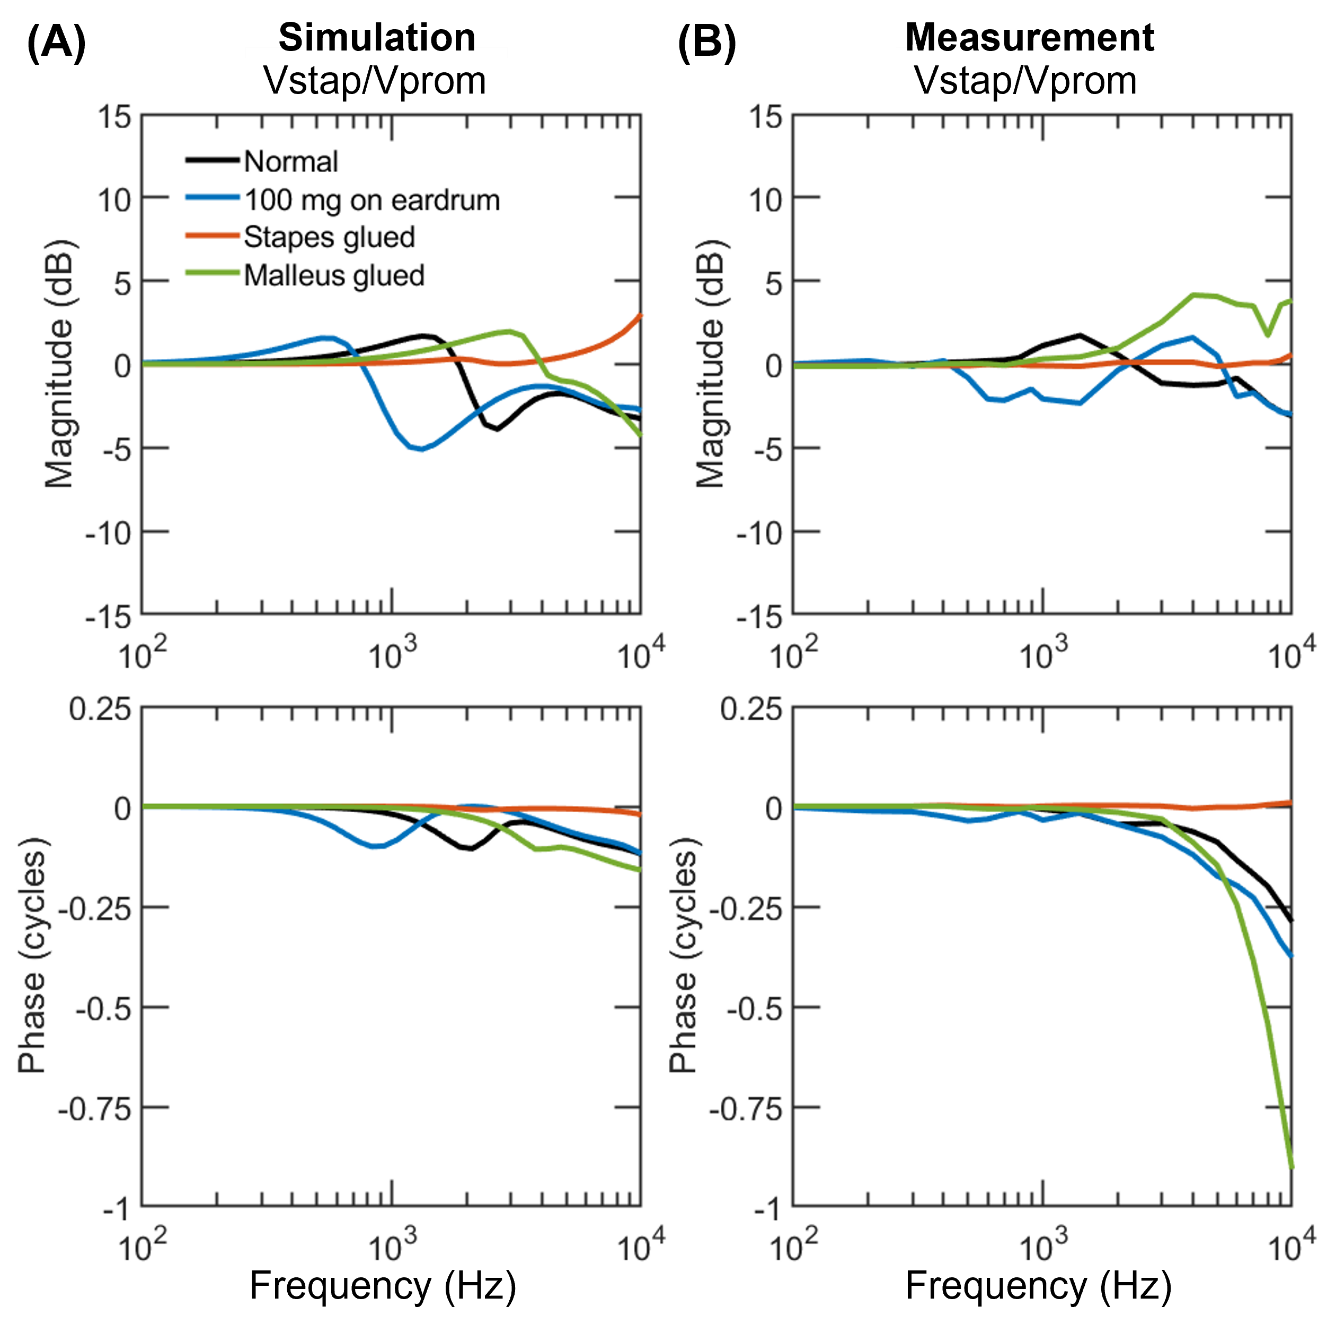


**Supplemental Figure 2.** Simulated (A) and measured (B) ratio of the stapes velocity to the promontory velocity in human ears under normal (black lines) and perturbed ear conditions (color lines). The simulations are performed using the fitted parameters. The measurements are from Stenfelt et al. (25).


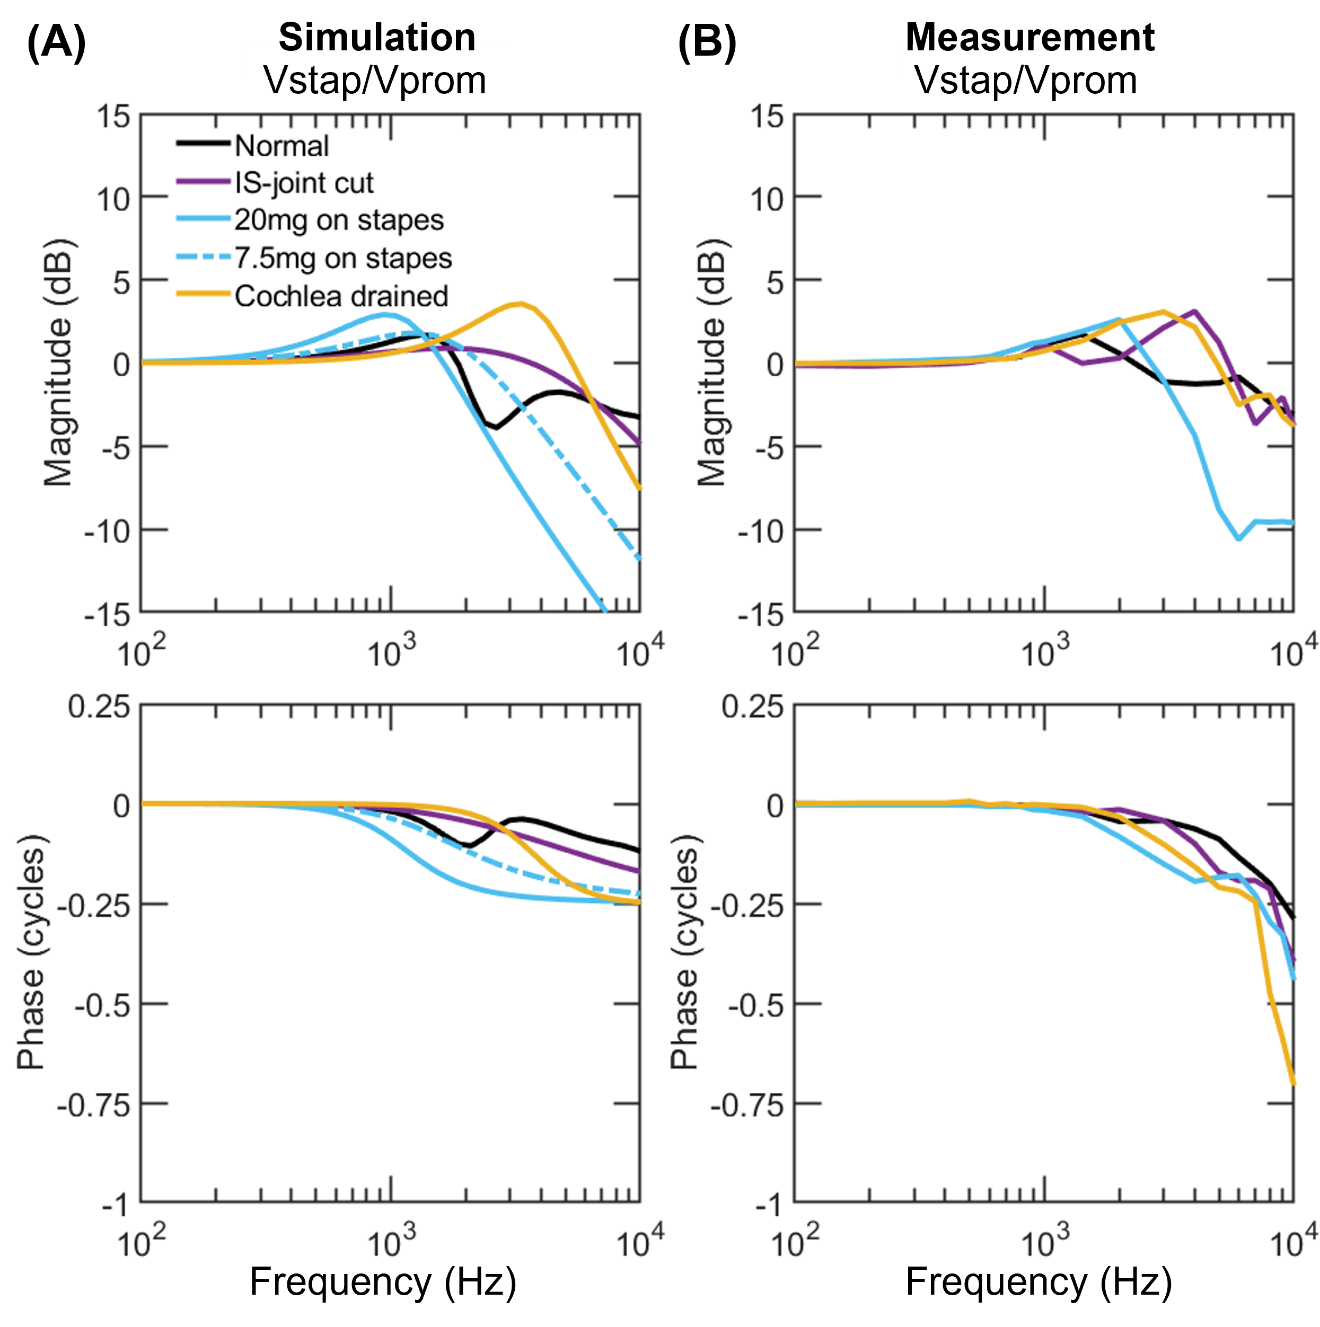


**Supplemental Figure 3.** Simulated (A) and measured (B) ratio of the stapes velocity to the promontory velocity in human ears under the normal condition (black lines), after the separation of incudostapedial joint (purple lines), and under the subsequent perturbations (cyan and yellow lines).The simulations are performed using the fitted parameters. The measurements are from Stenfelt et al. (25).
